# Supplementary material
Source: PubMed Central journal article supplement (PMC4450365)

# Supplementary Figure 1

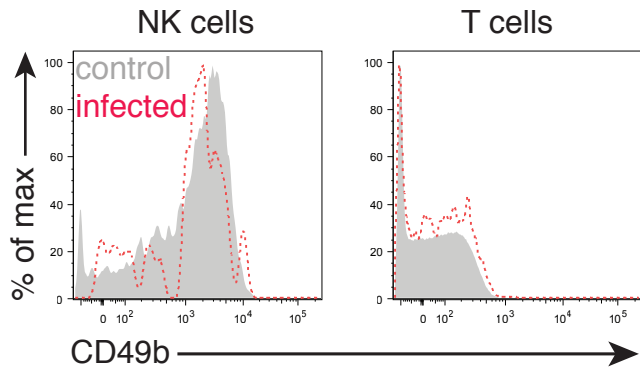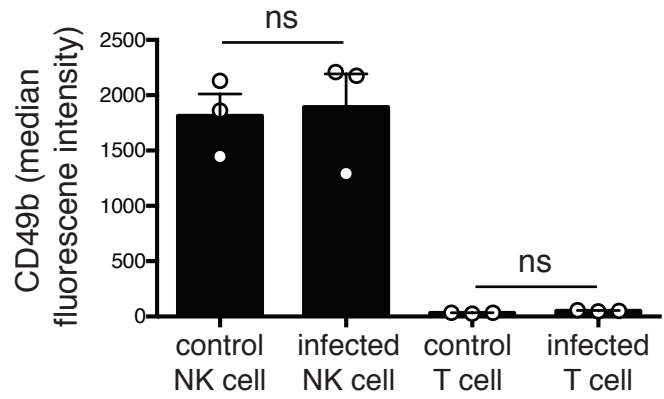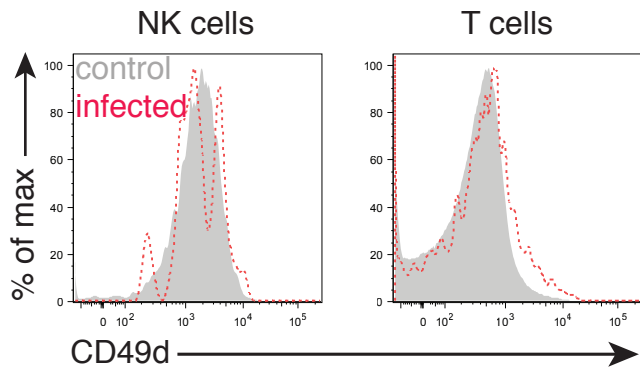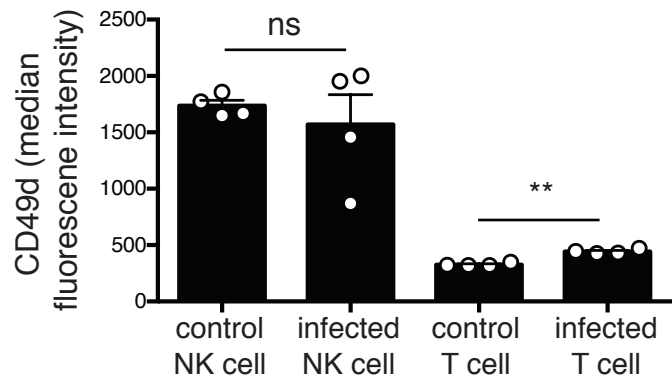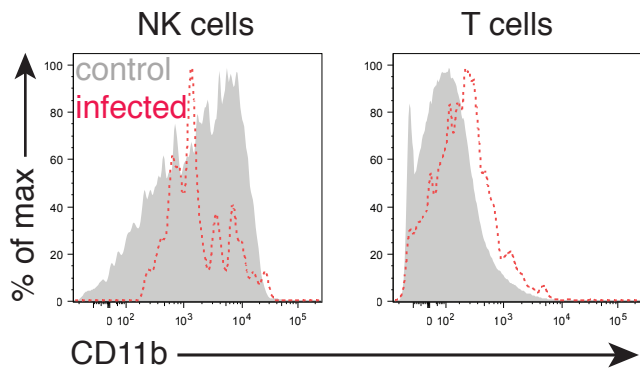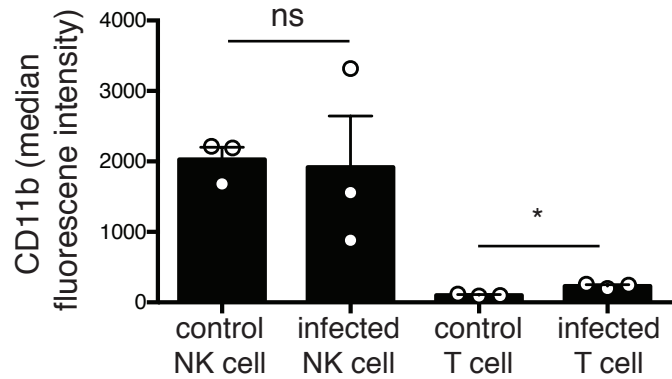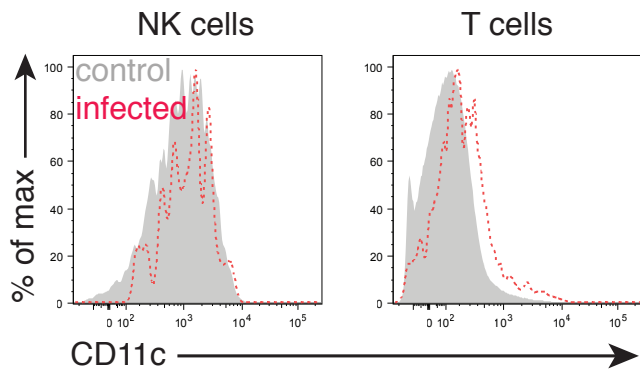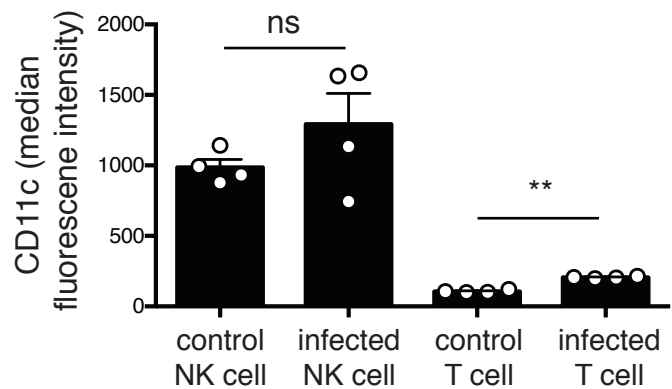

Supplement: icb2014106x1.pdf [file icb2014106x1.pdf]
